# Supplementary material for: Virus-Induced Dormancy in the Archaeon Sulfolobus islandicus
Source: PubMed Central journal article supplement — mBio. 2015 Mar 31;6(2):e02565-14. doi: 10.1128/mBio.02565-14 (PMC4453537; doi:10.1128/mbio.02565-14), 2015-03-31
Supplement: mbo002152243st1.pdf [file mbo002152243st1.pdf]

| Strain                          | Genotypes/Description                                                                                                                                  | Phenotype/Description                                                               | Reference/Source |
|---------------------------------|--------------------------------------------------------------------------------------------------------------------------------------------------------|-------------------------------------------------------------------------------------|------------------|
| <b>M.16.4</b>                   | Wild-type. <i>S. islandicus</i> strain isolated from hot spring M16 in the Mutnovsky Volcano region of Kamchatka, Russia.                              | Immune to SSV9.                                                                     | 24,48            |
| <b>RJW002</b>                   | $\Delta pyrEF$ , the complete <i>pyrEF</i> gene was deleted from <i>S. islandicus</i> M.16.4                                                           | Immune to SSV9; uracil auxotroph.                                                   | 13               |
| <b><math>\Delta cas1</math></b> | $\Delta pyrEF\Delta cas1$ , <i>cas1</i> was deleted from RJW002                                                                                        | Immune to SSV9 but new CRISPR spacer addition is inactivated; uracil auxotroph.     | This study       |
| <b><math>\Delta cas3</math></b> | $\Delta pyrEF\Delta cas3'+3''$ , <i>cas3'</i> and <i>cas3''</i> were deleted from RJW002                                                               | Immune deficient; Type IA CRISPR interference inactivated; uracil auxotroph.        | This study       |
| <b><math>\Delta cas6</math></b> | $\Delta pyrEF\Delta cas6$ , <i>cas6</i> was deleted from RJW002                                                                                        | Immune deficient; CRISPR RNA processing inactivated; uracil auxotroph.              | This study       |
| <b><math>\Delta A1</math></b>   | $\Delta pyrEF\Delta A1$ , CRISPR A1 repeat-spacer array was deleted from RJW002                                                                        | Immune deficient against SSV9; Spacer match against SSV9 deleted; uracil auxotroph. | This study       |
| <b><math>\Delta A2</math></b>   | $\Delta pyrEF\Delta A2$ , CRISPR A2 repeat-spacer array was deleted from RJW002                                                                        | Immune to SSV9; uracil auxotroph.                                                   | This study       |
| <b>Y08.82.36</b>                | Wild-type. <i>S. islandicus</i> strain isolated from hot spring NG06 in the Norris Geyser Basin Region of Yellowstone National Park, USA in year 2008. | Susceptible to SSV9. Used as titering host.                                         | This study       |
| <b>GV.10.6</b>                  | Wild-type. <i>S. islandicus</i> strain infected with SSV9. Isolated from the Valley of the Geysers, Kamchatka, Russia in year 2000.                    | SSV9 producer.                                                                      | 12               |
