# Supplementary material for: Virus-Induced Dormancy in the Archaeon Sulfolobus islandicus
Source: PubMed Central journal article supplement — mBio. 2015 Mar 31;6(2):e02565-14. doi: 10.1128/mBio.02565-14 (PMC4453537; doi:10.1128/mbio.02565-14), 2015-03-31
Supplement: mbo002152243st2.pdf [file mbo002152243st2.pdf]

---

**Plasmids**

---

|               |                                                                                      |            |
|---------------|--------------------------------------------------------------------------------------|------------|
| pRJW2         | pUC19 carrying <i>SsopyrEF</i> marker                                                | 55         |
| pPIS-Cas1     | <i>cas1</i> knockout plasmid, pRJW2 carrying Up- and Dn-arm of <i>cas1</i>           | This study |
| pPIS-Cas3'+3" | <i>cas3'+3'</i> knockout plasmid, pRJW2 carrying Up- and Dn-arm of <i>cas3'+3'</i> " | This study |
| pPIS-Cas6     | <i>cas6</i> knockout plasmid, pRJW2 carrying Up- and Dn-arm of <i>cas6</i>           | This study |
| pPIS-CRISPR1  | CRISPR1 knockout plasmid, pRJW2 carrying Up- and Dn-arm of CRISPR1                   | This study |
| pPIS-CRISPR2  | CRISPR2 knockout plasmid, pRJW2 carrying Up- and Dn-arm of CRISPR2                   | This study |

---

**Viruses**

|                                                 |                                                             |    |
|-------------------------------------------------|-------------------------------------------------------------|----|
| <i>Sulfolobus</i> spindle shaped virus 9 (SSV9) | Isolated from the Valley of the Geysers, Kamchatka, Russia. | 12 |
|-------------------------------------------------|-------------------------------------------------------------|----|

---
