# Supplementary material for: Virus-Induced Dormancy in the Archaeon Sulfolobus islandicus
Source: PubMed Central journal article supplement — mBio. 2015 Mar 31;6(2):e02565-14. doi: 10.1128/mBio.02565-14 (PMC4453537; doi:10.1128/mbio.02565-14), 2015-03-31
Supplement: mbo002152243st3.pdf [file mbo002152243st3.pdf]

| Primers                                | Sequence (5'- 3') <sup>a</sup>                      |
|----------------------------------------|-----------------------------------------------------|
| <i>cas1</i> -up-F                      | 5'AAA <u>ACGCGT</u> ATGTCTTTACCCCACTCCTTA3'         |
| <i>cas1</i> -up-R                      | 5'AGA <u>ACTGCAGT</u> AGCATATTTCTTTTGACGTAAA3'      |
| <i>cas1</i> -dn-F                      | 5'AGA <u>ACTGCAGG</u> TAAAGTTGGCATCAAGTATCAGG3'     |
| <i>cas1</i> -dn-R                      | 5'AAG <u>CGTCGACG</u> CAAACCCCTTCTGTACTGGC3'        |
| <i>cas1</i> flankP-F                   | 5'ACAACACCCTACCTCCCTC3'                             |
| <i>cas1</i> flankP-R                   | 5'TTTTACGTGAAATGCTATTTCACTAA3'                      |
| <i>cas3</i> '+3" <sup>2</sup> -up-F    | 5'AAA <u>ACGCGT</u> AGTGTGTTGAACGGAAATGTG3'         |
| <i>cas3</i> '+3" <sup>2</sup> -up-R    | 5'AGA <u>ACTGCAGG</u> TAAACAGTGGGAGCCTTAA3'         |
| <i>cas3</i> '+3" <sup>2</sup> -dn-F    | 5'AGA <u>ACTGCAGG</u> GAAAGTAAAACCAGATTTGTTCC3'     |
| <i>cas3</i> '+3" <sup>2</sup> -dn-R    | 5' AAG <u>CGTCGACT</u> ATTGGCGAAATATAGCAAGT3'       |
| <i>cas3</i> '+3" <sup>2</sup> flankP-F | 5'TCGAAGGGTTGACTCTGCAA3'                            |
| <i>cas3</i> '+3" <sup>2</sup> flankP-R | 5'TTGAACCGAGATGGGATATAAA3'                          |
| <i>cas6</i> -up-F                      | 5'AAA <u>ACGCGT</u> AAGTGGAAATAGACGATGAAGAG3'       |
| <i>cas6</i> -up-R                      | 5'AGA <u>ACTGCAGAT</u> ACCCTATCTTGAAAATTAATGG3'     |
| <i>cas6</i> -dn-F                      | 5'AGA <u>ACTGCAGAA</u> AGGTTAAGGTCCAGCATAA3'        |
| <i>cas6</i> -dn-R                      | 5'AAG <u>CGTCGACAT</u> ATCTCGTTTCTGGTATAATCTTT3'    |
| <i>cas6</i> flankP-F                   | 5'ATTACACTTTTGATGACTACCACG3'                        |
| <i>cas6</i> flankP-R                   | 5'GTTTTTGTCTAAACTAGGCAAT3'                          |
| CRISPR1-up-F                           | 5'AAA <u>ACGCGT</u> GCACCAAATATCGTCAACT3'           |
| CRISPR1-up-R                           | 5'AGA <u>ACTGCAGT</u> ATACTATATTCTATGACTTGTTTGA3'   |
| CRISPR1-dn-F                           | 5'AGA <u>ACTGCAGCT</u> CAGAATTCTAGGCTAATCCCT3'      |
| CRISPR1-dn-R                           | 5'AAG <u>CGTCGAC</u> ACTAGCATATTTCTTTTGACGTAAA3'    |
| CRISPR1 flankP-F                       | 5'CCCATCTACTATCAATACTCTCA3'                         |
| CRISPR1 flankP-R                       | 5'CACCGTATCTAATGTCCTTTT3'                           |
| CRISPR2-up-F                           | 5'AAA <u>ACGCGT</u> TCTTACACGACAAACAGATGCAA3'       |
| CRISPR2-up-R                           | 5'AGA <u>ACTGCAGA</u> ACAACCTCCCTCAGCTACAAGC3'      |
| CRISPR2-dn-F                           | 5'AGA <u>ACTGCAGT</u> ACTATAATGTAAGTTAGATTTTATAAG3' |
| CRISPR2-dn-R                           | 5'AAG <u>CGTCGACG</u> TGGTCAGTTTATTGGACTC3'         |
| CRISPR2 flankP-F                       | 5'GTTGGTTCGGTCAAATAAAAT3'                           |
| CRISPR2 flankP-R                       | 5'TACCCATCTGTACAATCCTTTG3'                          |
| SSV9F                                  | 5'GTGAAGCGACCAACATAGGTGCAA3'                        |
| SSV9R                                  | 5'GTTGCGTTTGTACCGTTACGCTA3'                         |
