# Supplementary figures and images for: Virus-Induced Dormancy in the Archaeon Sulfolobus islandicus
Source: PubMed Central journal article supplement — mBio. 2015 Mar 31;6(2):e02565-14. doi: 10.1128/mBio.02565-14 (PMC4453537; doi:10.1128/mbio.02565-14), 2015-03-31

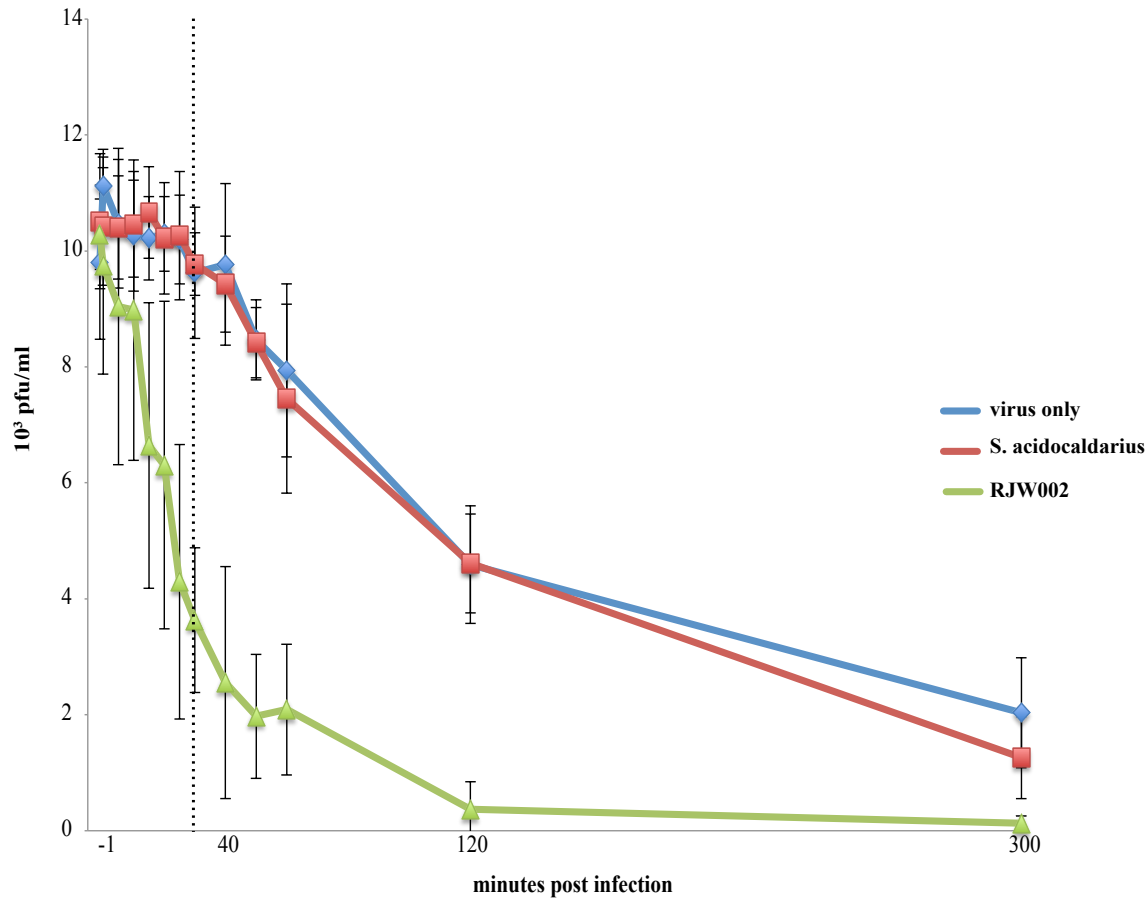

Supplement: mbo002152243sf1.pdf [file mbo002152243sf1.pdf]

**a**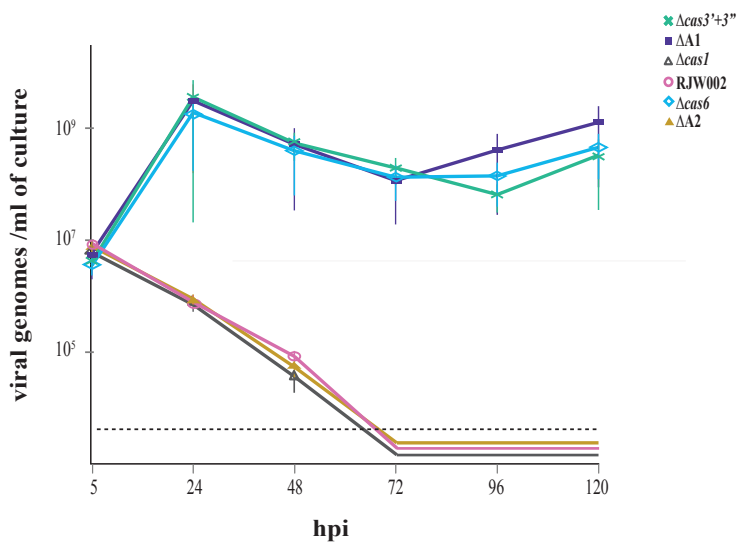**b**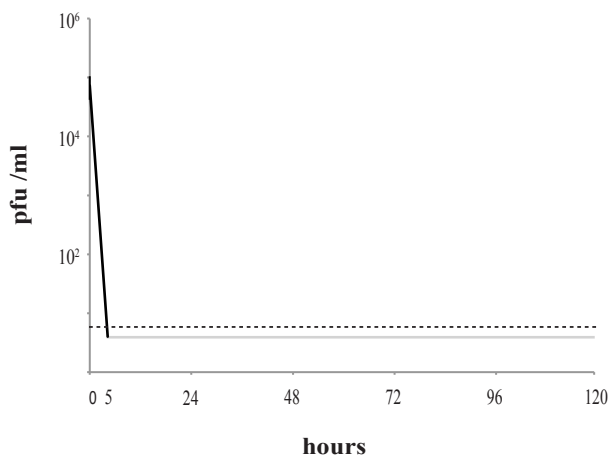**c**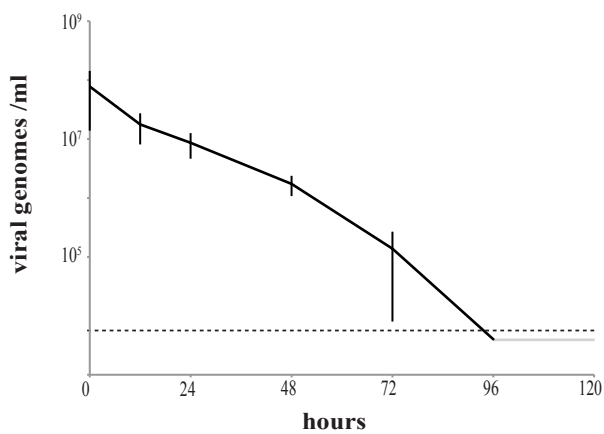

Supplement: mbo002152243sf2.pdf [file mbo002152243sf2.pdf]

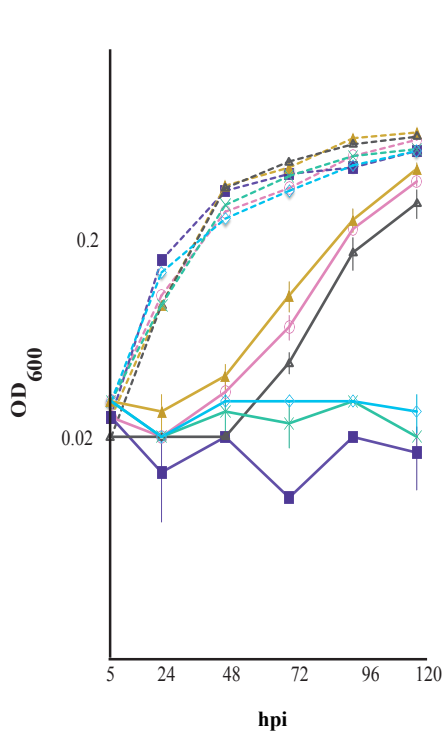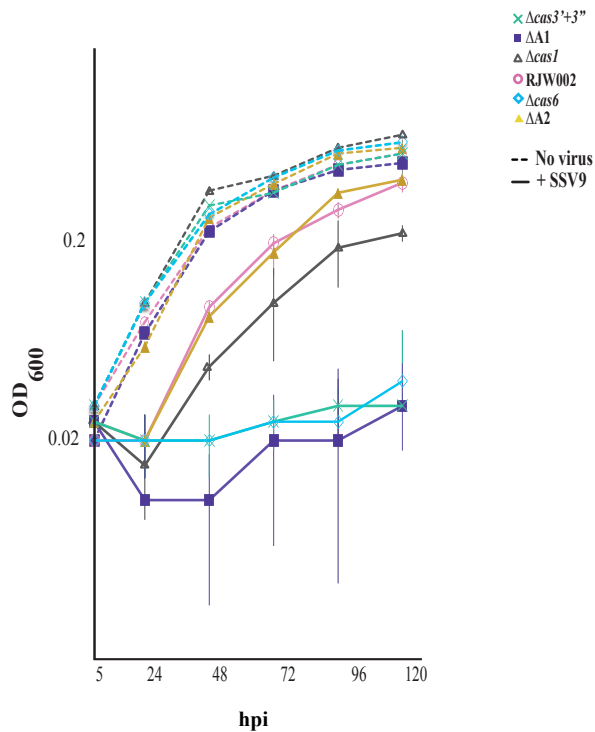

Supplement: mbo002152243sf3.pdf [file mbo002152243sf3.pdf]
